# Supplementary material
Source: HighWire-hosted journal article supplement (https://bmjopen.bmj.com/content/8/6/e019220)
Supplement: inline-supplementary-material-1 [file inline-supplementary-material-1.pdf]

## Appendix

**Manuscript Title:** Policies Supporting Informal Caregivers Across Canada: A Scoping

Review Protocol

**Manuscript Type:** Scoping Review Protocol

**Table 1: Search Strategy and Terms**

|                                                                                    |                                                                                                                                                                                                                                                                                                                                                                                                                                                                                                                                                              |            |                  |            |                      |            |                  |
|------------------------------------------------------------------------------------|--------------------------------------------------------------------------------------------------------------------------------------------------------------------------------------------------------------------------------------------------------------------------------------------------------------------------------------------------------------------------------------------------------------------------------------------------------------------------------------------------------------------------------------------------------------|------------|------------------|------------|----------------------|------------|------------------|
| <b>Search Question</b>                                                             | Policies supporting informal caregivers across Canada                                                                                                                                                                                                                                                                                                                                                                                                                                                                                                        |            |                  |            |                      |            |                  |
| <b>Key Concepts</b>                                                                | Canada, Federal/Province/Territory, Policies, Informal Caregivers                                                                                                                                                                                                                                                                                                                                                                                                                                                                                            |            |                  |            |                      |            |                  |
| <b>Search Strategy for Medline</b> [will be adapted for other databases]           | Canada. ti,ab,kw. AND (federal OR government OR national OR central OR provinc* OR territor* OR region* OR local OR municipal*).ti,ab,kw. AND (policy OR policies OR strateg* OR mechanism* OR instrument* OR "policy objective*" OR "policy action*" OR "policy area*" OR "policy instrument*" OR "policy issue*" OR "policy domain*"). ti,ab,kw. AND ("informal care*" OR carer* OR volunteer* OR family* OR families OR relative* OR friend* OR caregiver* OR "care giver*" OR voluntar* OR unpaid OR spouse OR child* OR partner OR neighbour).ti,ab,kw. |            |                  |            |                      |            |                  |
| <b>Limit to:</b>                                                                   | English language and full text and "review articles" and humans and yr="1990 -Current"                                                                                                                                                                                                                                                                                                                                                                                                                                                                       |            |                  |            |                      |            |                  |
| <b>Initial Search Results in Medline Ovid</b> (search conducted on 12 August 2017) | 1508                                                                                                                                                                                                                                                                                                                                                                                                                                                                                                                                                         |            |                  |            |                      |            |                  |
| <b>Search Terms</b>                                                                |                                                                                                                                                                                                                                                                                                                                                                                                                                                                                                                                                              |            |                  |            |                      |            |                  |
|                                                                                    | <b>Concept 1</b>                                                                                                                                                                                                                                                                                                                                                                                                                                                                                                                                             | <b>AND</b> | <b>Concept 2</b> | <b>AND</b> | <b>Concept 3</b>     | <b>AND</b> | <b>Concept 4</b> |
| OR                                                                                 | Canada                                                                                                                                                                                                                                                                                                                                                                                                                                                                                                                                                       |            | Federal          |            | Policy               |            | "Informal Care*" |
|                                                                                    |                                                                                                                                                                                                                                                                                                                                                                                                                                                                                                                                                              |            | Government       |            | Policies             |            | Carer*           |
| OR                                                                                 |                                                                                                                                                                                                                                                                                                                                                                                                                                                                                                                                                              |            | National         |            | Strateg*             |            | Volunteer*       |
| OR                                                                                 |                                                                                                                                                                                                                                                                                                                                                                                                                                                                                                                                                              |            | Central          |            | Mechanism*           |            | Relative*        |
| OR                                                                                 |                                                                                                                                                                                                                                                                                                                                                                                                                                                                                                                                                              |            | Provinc*         |            | Instrument*          |            | Family           |
| OR                                                                                 |                                                                                                                                                                                                                                                                                                                                                                                                                                                                                                                                                              |            | Territor*        |            | "Policy objective*"  |            | Families         |
| OR                                                                                 |                                                                                                                                                                                                                                                                                                                                                                                                                                                                                                                                                              |            | Region*          |            | "Policy action*"     |            | Relative*        |
| OR                                                                                 |                                                                                                                                                                                                                                                                                                                                                                                                                                                                                                                                                              |            | Local            |            | "Policy area*"       |            | Friend*          |
| OR                                                                                 |                                                                                                                                                                                                                                                                                                                                                                                                                                                                                                                                                              |            | Municipal*       |            | "Policy instrument*" |            | Caregiver*       |
| OR                                                                                 |                                                                                                                                                                                                                                                                                                                                                                                                                                                                                                                                                              |            |                  |            | "Policy issue*"      |            | "Care giver*"    |
| OR                                                                                 |                                                                                                                                                                                                                                                                                                                                                                                                                                                                                                                                                              |            |                  |            | "Policy domain*"     |            | "Informal care*" |
| OR                                                                                 |                                                                                                                                                                                                                                                                                                                                                                                                                                                                                                                                                              |            |                  |            | "Policy domain*"     |            | Voluntar*        |
| OR                                                                                 |                                                                                                                                                                                                                                                                                                                                                                                                                                                                                                                                                              |            |                  |            |                      |            | Unpaid           |
| OR                                                                                 |                                                                                                                                                                                                                                                                                                                                                                                                                                                                                                                                                              |            |                  |            |                      |            | Spouse           |
| OR                                                                                 |                                                                                                                                                                                                                                                                                                                                                                                                                                                                                                                                                              |            |                  |            |                      |            | Child*           |
| OR                                                                                 |                                                                                                                                                                                                                                                                                                                                                                                                                                                                                                                                                              |            |                  |            |                      |            | Partner          |
| OR                                                                                 |                                                                                                                                                                                                                                                                                                                                                                                                                                                                                                                                                              |            |                  |            |                      |            | Neighbour        |
| OR                                                                                 |                                                                                                                                                                                                                                                                                                                                                                                                                                                                                                                                                              |            |                  |            |                      |            |                  |

**Table 2: Search Sources**

| <b>Databases</b>                                                  | <b>Conference Abstracts</b>                                                                      | <b>Grey Literature</b>                          |
|-------------------------------------------------------------------|--------------------------------------------------------------------------------------------------|-------------------------------------------------|
| Applied Social Sciences Index and Abstracts via ProQuest          | Conference Proceedings Citation Index- Science (CPCI-S) via Web of Science                       | Dissertations & Theses A&I via ProQuest         |
| EMBASE via Ovid SP [Excluding MEDLINE]                            | Conference Proceedings Citation Index- Social Science & Humanities (CPCI-SSH) via Web of Science | ISI Proceedings                                 |
| International Bibliography of the Social Sciences via ProQuest    |                                                                                                  | Joanna Briggs Institute EBP Database            |
| McMaster Health Forum - Health System Evidence                    |                                                                                                  | Google                                          |
| MEDLINE via Ovid                                                  |                                                                                                  | Google Scholar                                  |
| PAIS International via ProQuest                                   |                                                                                                  | OpenGrey                                        |
| PubMed [Excluding MEDLINE]                                        |                                                                                                  | Canadian Public Policy Index                    |
| Science Citation Index Expanded (SCI-EXPANDED) via Web of Science |                                                                                                  | PAIS Index - Public Affairs Information Service |
| Scopus                                                            |                                                                                                  | Canadian Research Index                         |
| Social Science Citation Index (SSRN)                              |                                                                                                  | Canadian Electronic Library                     |
| Social Sciences Citation Index (SSCI) via Web of Science          |                                                                                                  | Canadian Public Policy Index                    |
| Social Services Abstracts via ProQuest                            |                                                                                                  | LabourSource (formerly Labour Spectrum)         |
| Sociological Abstracts via ProQuest                               |                                                                                                  |                                                 |
| Informit Health Collection                                        |                                                                                                  |                                                 |
| International Bibliography of Social Sciences                     |                                                                                                  |                                                 |
| Cumulative Index to Nursing and Allied Health Literature (CINAHL) |                                                                                                  |                                                 |

|           |  |  |
|-----------|--|--|
| PsyclINFO |  |  |
|-----------|--|--|

**Table 3: Dissemination of Findings**

| <b>Intended Audience</b>                             | <b>Dissemination Tools/Mean</b>                                                                                          |
|------------------------------------------------------|--------------------------------------------------------------------------------------------------------------------------|
| Federal, provincial, and local/municipal governments | Research report, policy brief, blog, YouTube videos, webinar                                                             |
| Policy makers in other countries                     | Research report and policy briefs available online for free as an evidence repository, blogs, YouTube videos, webinar    |
| Research community                                   | Peer-reviewed articles and conference presentations, blogs, YouTube videos, webinar                                      |
| General public                                       | Media engagement through press releases and conferences targeting publication in newspapers, magazine, radio, television |
